# Supplementary material for: Frizzled-10 and cancer progression: Is it a new prognostic marker?
Source: PubMed Central journal article supplement (PMC5787514; doi:10.18632/oncotarget.23159), 2017-12-12
Supplement: oncotarget-09-824-s001.pdf [file oncotarget-09-824-s001.pdf]

## Frizzled-10 and cancer progression: Is it a new prognostic marker?

### SUPPLEMENTARY MATERIALS

Supplementary Table 1: Data of the single patients. See Supplementary\_Table\_1

Supplementary Table 2: Data analysis for the different analysed pathologies

| Type of tissue<br>Pathological diagnosis | Colon                      |                   | Skin                       |                   | Stomach                    |                   |
|------------------------------------------|----------------------------|-------------------|----------------------------|-------------------|----------------------------|-------------------|
|                                          | % Positive pixel cytoplasm | % Positive nuclei | % Positive pixel cytoplasm | % Positive nuclei | % Positive pixel cytoplasm | % Positive nuclei |
| DYSPLASTIC NEVUS                         |                            |                   | 67.89 ± 25.23              | 94.73 ± 12.56     |                            |                   |
| Hyperplasia                              | 10.45 ± 5.2                | 78.89 ± 23.1      |                            |                   |                            |                   |
| LOW GRADE DYSPLASIA                      | 29.43 ± 13.15              | 74.57 ± 10.4      |                            |                   | 33.76 ± 0.25               | 70.47 ± 7.07      |
| HIGH GRADE DYSPLASIA                     | 36.41 ± 20.16              | 59.32 ± 15.60     |                            |                   | 20.44 ± 1.42               | 56.94 ± 25.33     |
| Tis TUMOR                                |                            |                   | 89.2 ± 22.12               | 71.76 ± 10.98     |                            |                   |
| T1 TUMOR                                 | 36.78 ± 10.51              | 54.23 ± 5.6       | 77.26 ± 5.12               | 95.91 ± 23.15     | 20.99 ± 9.19               | 44.66 ± 25.95     |
| T2 TUMOR                                 | 55.06 ± 20.47              | 40.67 ± 18.65     | 55.29 ± 4.18               | 86.07 ± 9.54      | 21.14 ± 7.54               | 63.24 ± 7.3       |
| T3 TUMOR                                 | 65.18 ± 16.29              | 5.04 ± 2.96       | 78.63 ± 9.29               | 3.44 ± 0.26       | 18.5 ± 0.21                | 40.11 ± 19.22     |
| T4 TUMOR                                 | 44.25 ± 11.21              | 3.38 ± 1.24       | 32.64 ± 2.23               | 2.56 ± 1.1        | 11.5 ± 1.77                | 28.6 ± 13.09      |
| METASTASES                               | 68.24 ± 13.23              | 1.69 ± 0.053      | 38.42 ± 3.58               | 6.89 ± 1.45       | 7.99 ± 3.33                | 9.82 ± 7.25       |
